# Supplementary material
Source: HighWire-hosted journal article supplement (https://www.cmajopen.ca/highwire/filestream/87591/field_highwire_adjunct_files/1/open-2021-0093-2-at.pdf)
Supplement: open-2021-0093-2-at.pdf [file open-2021-0093-2-at.pdf]

Appendix 2, as supplied by the authors. Appendix to: Nandith NGA, Dong X, Tafessu HM, et al. A province-wide HIV initiative to accelerate initiation of treatment-as-prevention and virologic suppression in British Columbia, Canada: a population-based cohort study. *CMAJ Open* 2022. DOI:10.9778/cmajo.20210093. Copyright © 2022 The Author(s) or their employer(s). To receive this resource in an accessible format, please contact us at [cmajgroup@cmaj.ca](mailto:cmajgroup@cmaj.ca).

The distribution of time from HIV diagnosis to ART initiation and from ART initiation to viral suppression (measured in months) before and after STOP HIV/AIDS roll-out, stratified by selected demographic and clinical characteristics.

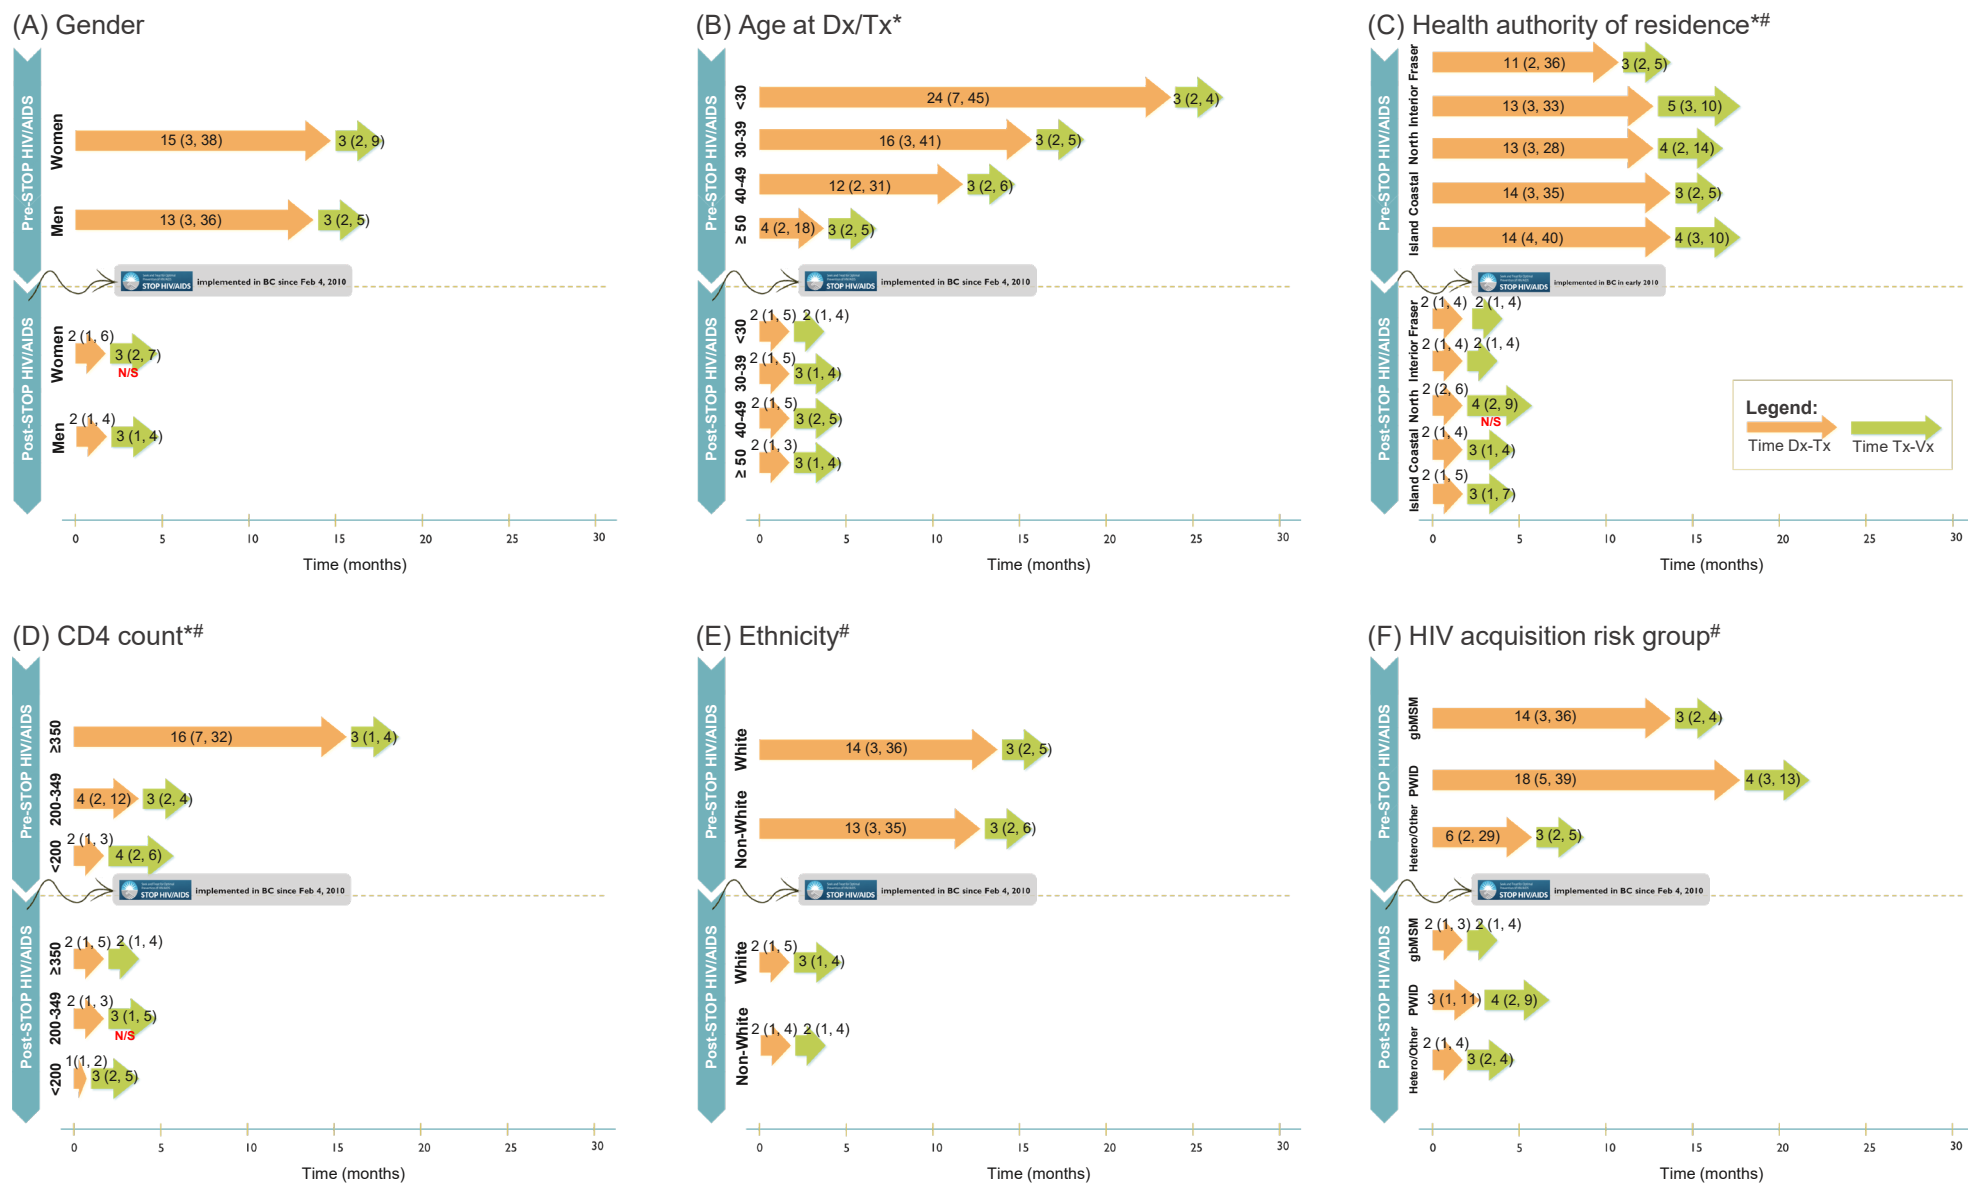

Note: Dx: HIV diagnosis; Tx: ART initiation; Vx: Viral suppression; North: Northern Health Authority; Coastal: Vancouver Coastal; Island: Vancouver Island. \*Age, CD4 level and health authority of residence were measured at HIV diagnosis for time Dx-Tx and at ART initiation for the Tx-Vx, respectively. #Analyses for the unknown group is not shown. Time is in months, presented as median (25th percentile, 75th percentile). N/S: The difference in time before and after STOP HIV/AIDS for this subgroup was NOT statistically significant (p-value>0.05).
